# Supplementary material for: Diverse CD8 T Cell Responses to Viral Infection Revealed by the Collaborative Cross
Source: PubMed Central journal article supplement — Cell Rep. Author manuscript; Available in PMC 2020 May 11. (PMC7212788; doi:10.1016/j.celrep.2020.03.072), 2020-04-14
Supplement: NIHMS1584942-supplement-1.pdf [file NIHMS1584942-supplement-1.pdf]

**Cell Reports, Volume 31**

**Supplemental Information**

**Diverse CD8 T Cell Responses to Viral  
Infection Revealed by the Collaborative Cross**

**Matthew D. Martin, Ramakrishna Sompallae, Christina S. Winborn, John T. Harty, and Vladimir P. Badovinac**

# Supplemental Figure 1

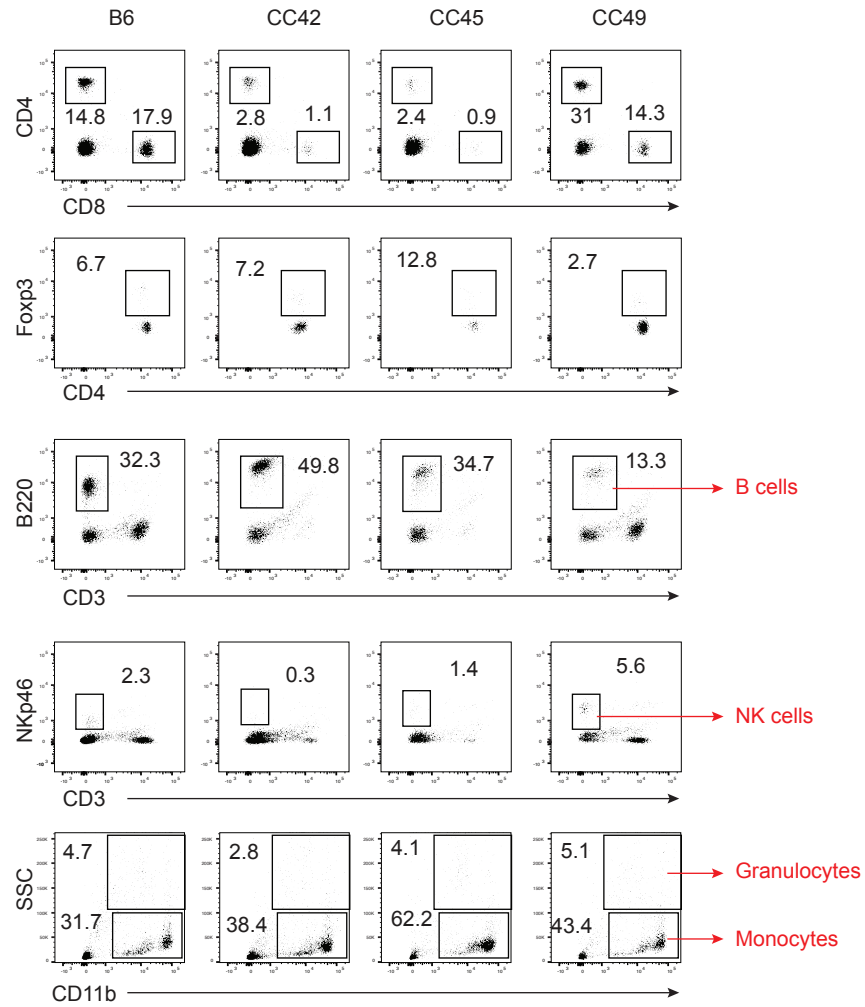

**Figure S1: Gating strategy for detection of immune cell subsets prior to infection, related to Fig. 1.** Representative dot plots for detection of CD4 and CD8 T cells, Foxp3+ CD4 T cells, B220+/CD3- B cells, NKp46+/CD3- NK cells, and SSCi/CD11bhi granulocytes and SSClo/CD11bhi monocytes for B6 mice and three strains of CC mice prior to infection.

## Supplemental Figure 2

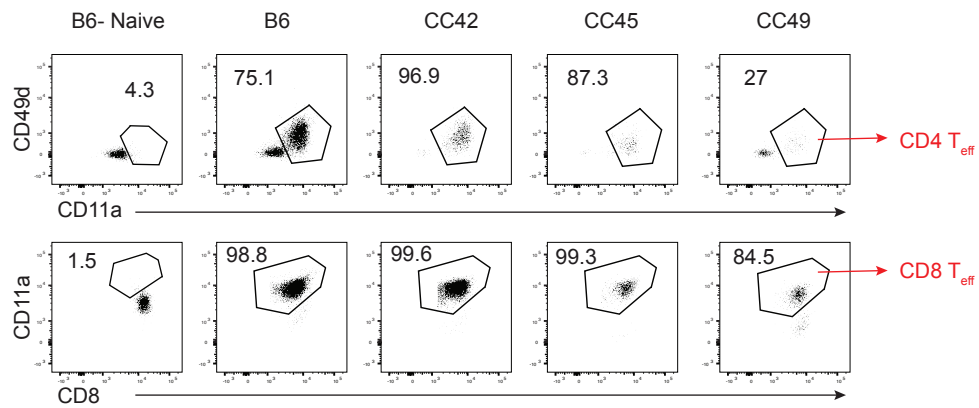

**Figure S2: Gating strategy for detection of effector (Teff) CD4 and CD8 T cells, related to Fig. 2.** Representative dot plots for detection of CD4 Teff (CD49dhi/CD11ahi) and CD8 Teff (CD11ahi/CD8alo) cells on d8 after LCMV-Armstrong infection for B6 mice and three strains of CC mice.

### Supplemental Figure 3

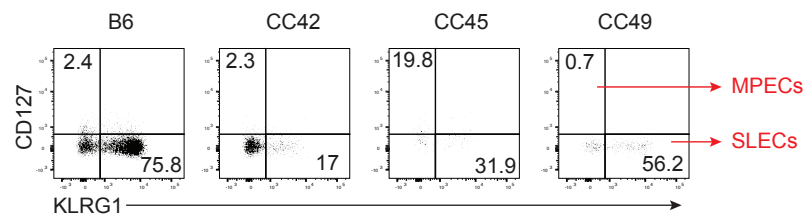

**Figure S3: Gating strategy for detection of effector CD8 T cell subsets, related to Fig. 3.** Representative dot plots for detection of short lived effector cells (SLECs- KLRG1hi/CD127lo) and memory precursor effector cells (MPECs- KLRG1lo/CD127hi) for gated CD8 Teff cells (CD11ahi/CD8alo) on d8 after LCMV-Armstrong infection for B6 mice and three strains of CC mice.

## Supplemental Figure 4

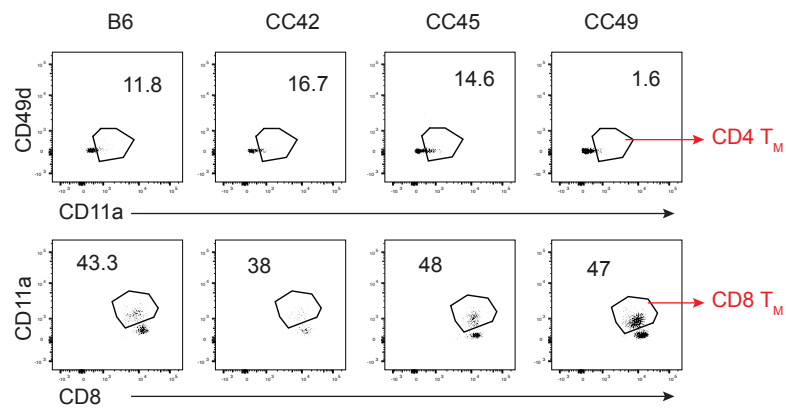

**Figure S4: Gating strategy for detection of memory (T<sub>M</sub>) CD4 and CD8 T cells, related to Fig. 4.** Representative dot plots for detection of CD4 T<sub>M</sub> (CD49<sup>hi</sup>/CD11a<sup>hi</sup>) and CD8 T<sub>M</sub> (CD11a<sup>hi</sup>/CD8<sup>lo</sup>) cells on d75 after LCMV-Armstrong infection for B6 mice and three strains of CC mice.

## Supplemental Figure 5

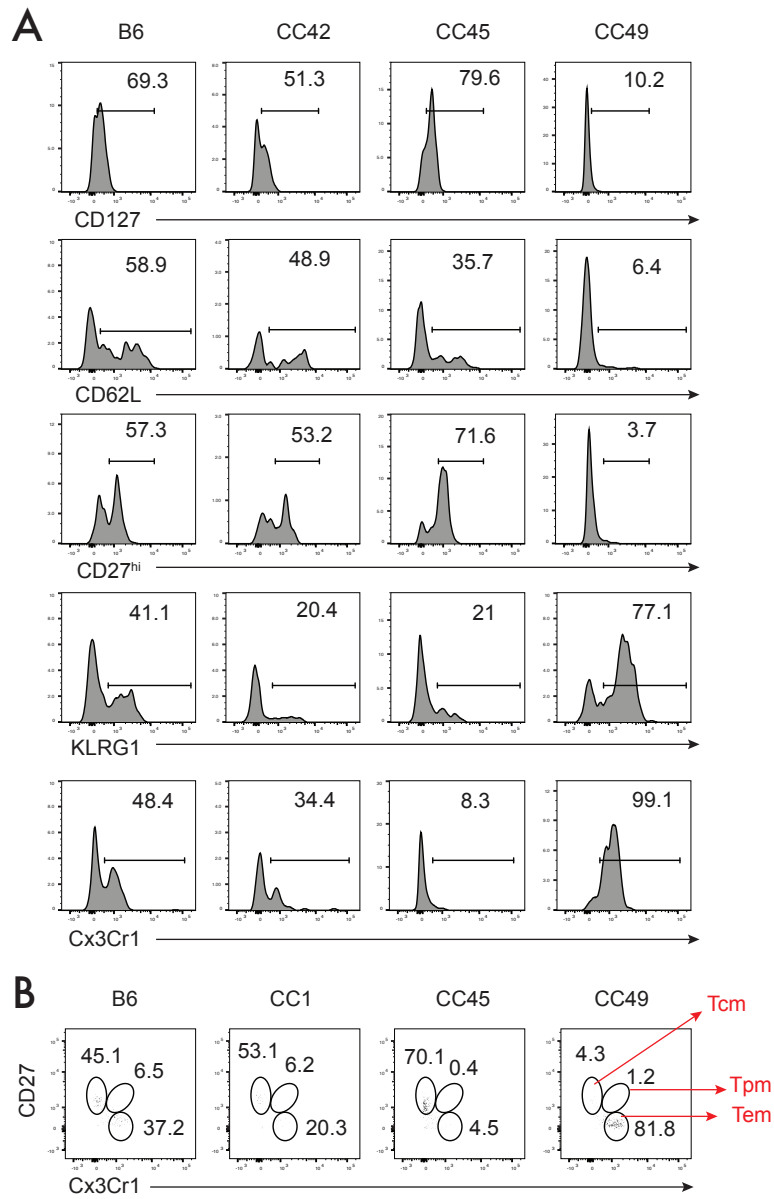

**Figure S5: Gating strategy for identification of memory CD8 T cell phenotype and subset representation, related to Fig. 5.** (A) Representative histograms for expression of CD127, CD62L, CD27<sup>hi</sup>, KLRG1, and Cx3Cr1 for gated CD8 TM cells (CD11a<sup>hi</sup>/CD8a<sup>lo</sup>) on d75 after LCMV-Armstrong infection for B6 mice and three strains of collaborative cross (CC) mice. (B) Representative dot plots for detection of effector memory (Tem- Cx3Cr1<sup>hi</sup>/CD27<sup>lo</sup>), peripheral memory (Tpm- Cx3Cr1<sup>int</sup>/CD27<sup>hi</sup>), and central memory (Tcm- Cx3Cr1<sup>lo</sup>/CD27<sup>hi</sup>) subsets for gated CD8 TM cells (CD11a<sup>hi</sup>/CD8a<sup>lo</sup>) on d75 after LCMV-Armstrong infection for B6 mice and three strains of CC mice.

## Supplemental Figure 6

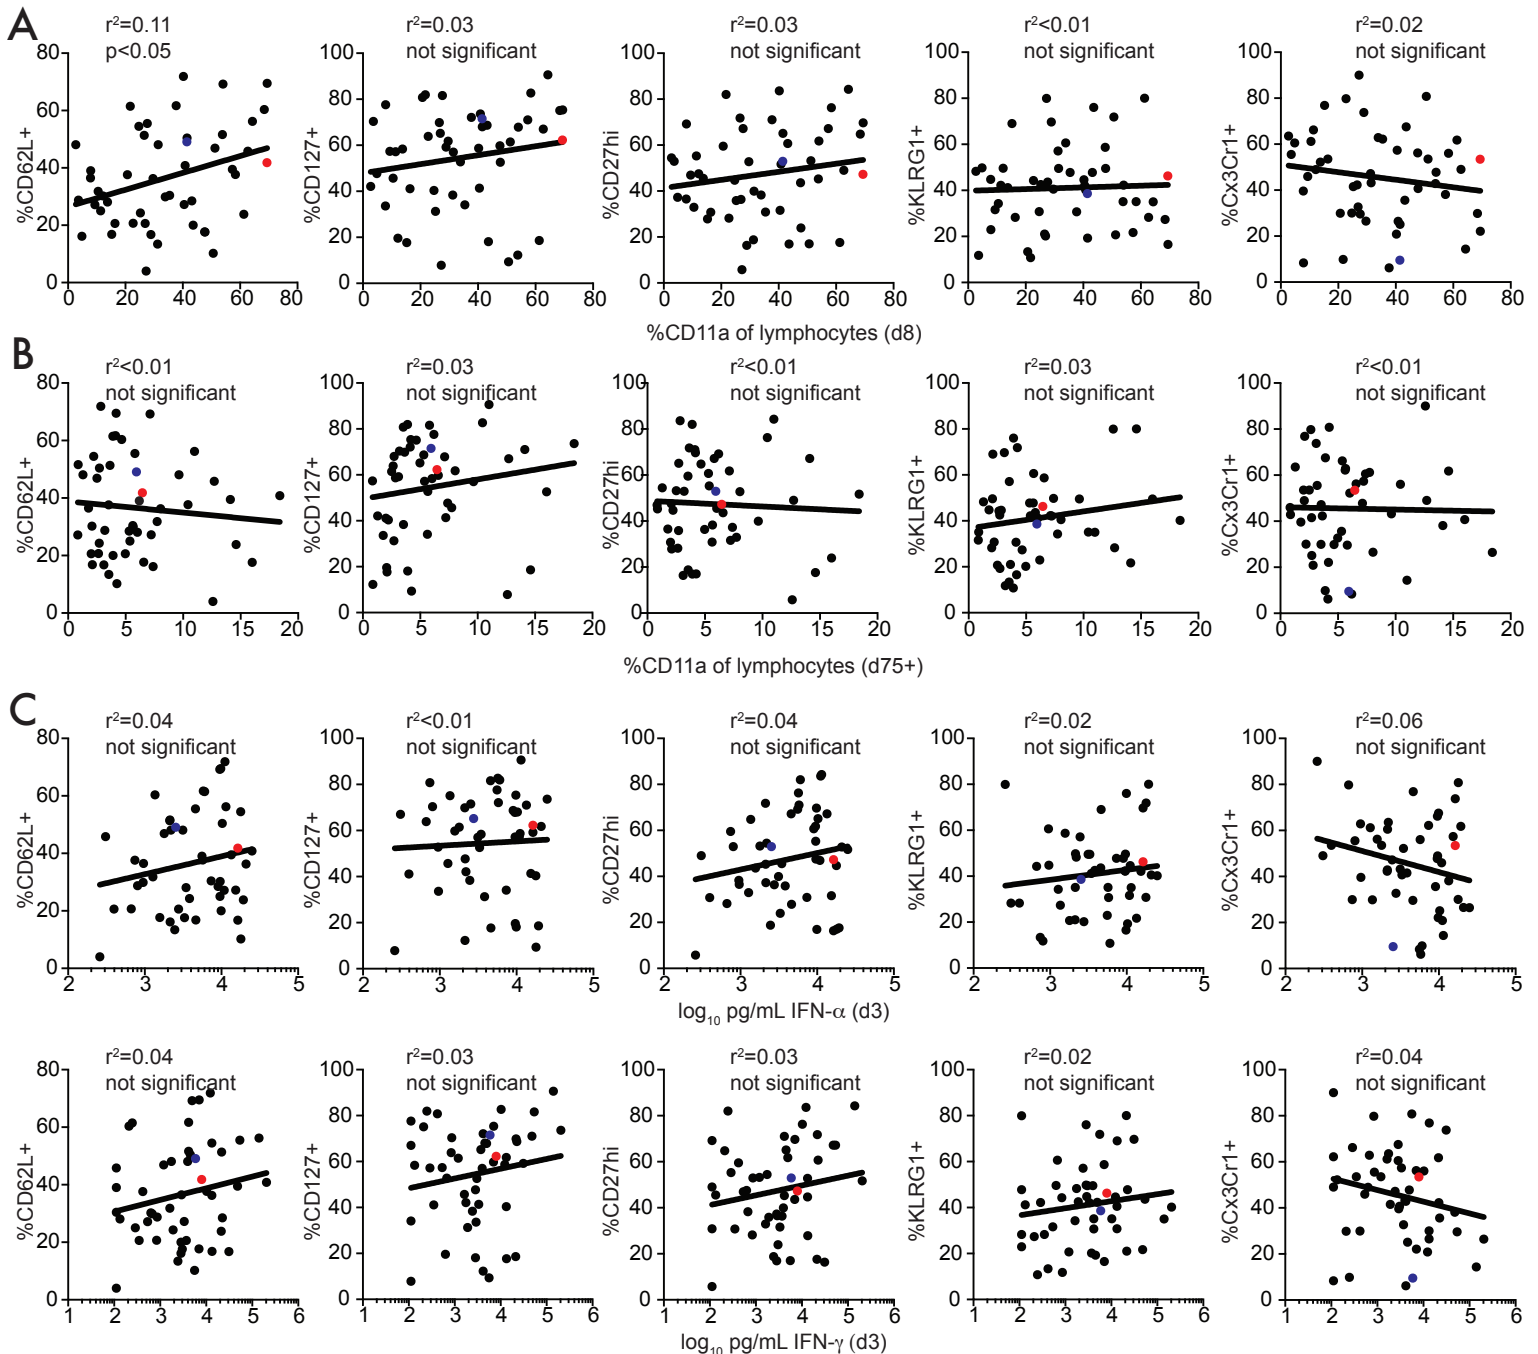

**Figure S6: Phenotype of memory CD8 T cells does not correlate with magnitude of systemic cytokine response or adaptive CD8 T cell responses, related to Fig. 5.** (A) Percentage of CD8 TM cells (d75) expressing CD127, CD62L, CD27hi, KLRG1, or Cx3Cr1 (y axis) relative to percentage of Tem cells (CD11ahi/CD8alo) (x axis) on d8 post infection. (B) Percentage of CD8 TM cells (d75) expressing CD127, CD62L, CD27hi, KLRG1, or Cx3Cr1 (y axis) relative to percentage of TM cells (CD11ahi/CD8alo) (x axis) on d75 post infection. (C) Percentage of CD8 TM cells (d75) expressing CD127, CD62L, CD27hi, KLRG1, or Cx3Cr1 (y axis) relative to concentration of IFN-g detected in serum (x axis) on d3 post infection. (D) Percentage of CD8 TM cells (d75) expressing CD127, CD62L, CD27hi, KLRG1, or Cx3Cr1 (y axis) relative to concentration of IFN-g detected in serum (x axis) on d3 post infection.  $n=2$  to 20 mice per group. Red dots indicate B6 mice, blue dots indicate BALB/c mice, and black dots indicate CC strains. Statistical significance of R-squared values based on linear regression analysis.

# Supplemental Figure 7

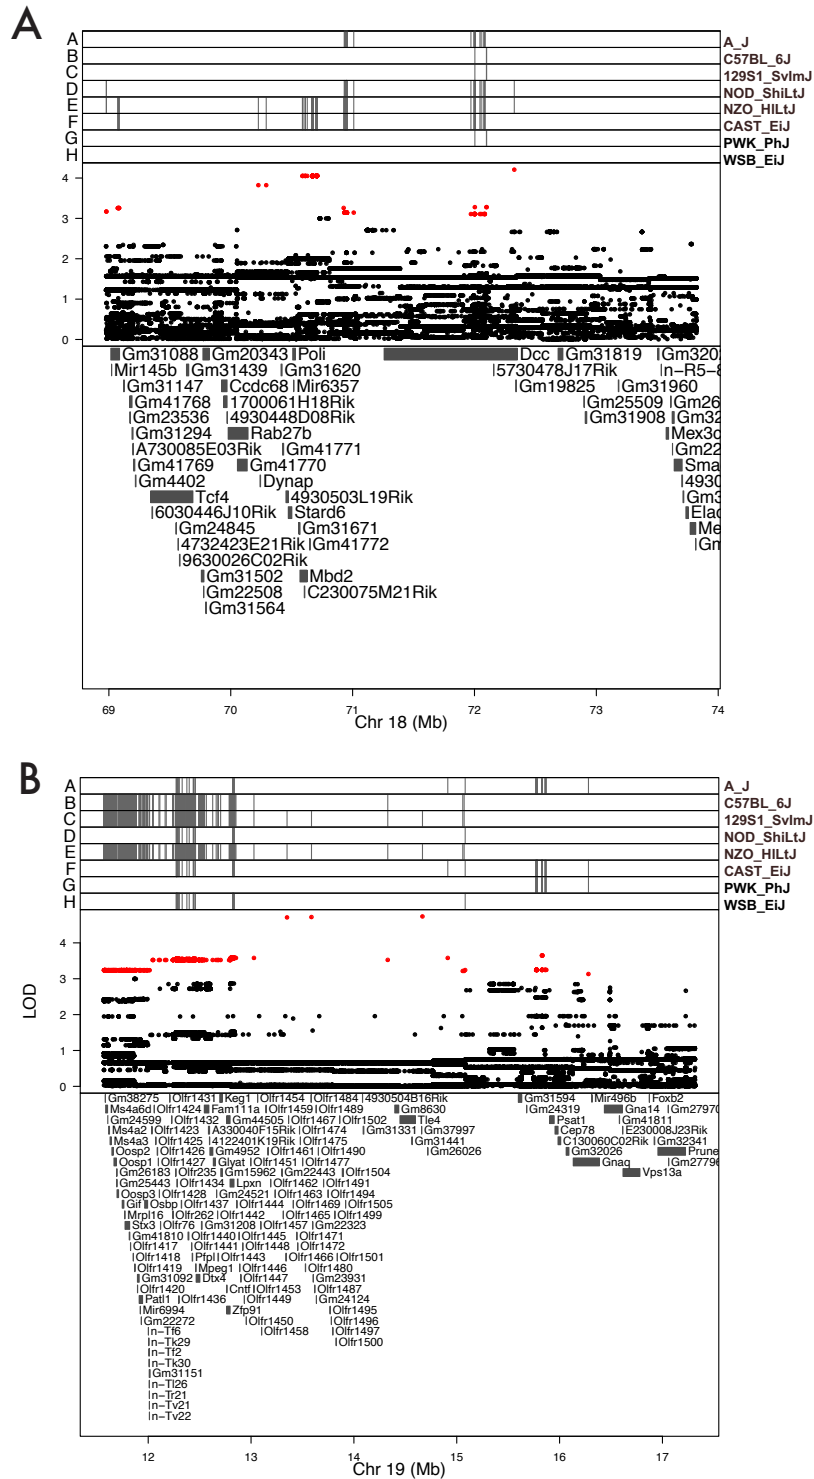

**Figure S7: Map of SNPs in chromosome 18 & 19 QTL regions associated CD62L+ CD8 TM cells, related to Fig. 6. (A)** The top panel shows the association of each SNP with CD62L+ CD8 TM cells. Chr 18 is on the X-axis and the LOD score is on the Y-axis. The middle panel shows the SNPs in the QTL interval region and SNPs with LOD score >3 are plotted in red. The bottom panel shows the genes in the interval from Mouse Genome Informatics. **(B)** The top panel shows the association of each SNP with CD62L+ CD8 TM cells. Chr 19 is on the X-axis and the LOD score is on the Y-axis. The middle panel shows the SNPs in the QTL interval region and SNPs with LOD score >3 are plotted in red. The bottom panel shows the genes in the interval from Mouse Genome Informatics.



| <b>Supplemental Table 1. CC strains. Related to STAR Methods.</b> |                    |                         |                  |
|-------------------------------------------------------------------|--------------------|-------------------------|------------------|
| <b>#</b>                                                          | <b>Strain Name</b> | <b>H2-D<sup>b</sup></b> | <b># of mice</b> |
| 1                                                                 | CC003/UNC          | Yes                     | 3                |
| 2                                                                 | CC002/UNC          | Yes                     | 3                |
| 3                                                                 | CC019/TAUUNC       | No                      | 3                |
| 4                                                                 | CC037/TAUUNC       | Yes                     | 2                |
| 5                                                                 | CC001/UNC          | Yes                     | 2                |
| 6                                                                 | CC041/TAUUNC       | Yes                     | 3                |
| 7                                                                 | CC068/TAUUNC       | Yes                     | 3                |
| 8                                                                 | CC055/TAUUNC       | No                      | 3                |
| 9                                                                 | CC006/TAUUNC       | Yes                     | 3                |
| 10                                                                | CC071/TAUUNC       | No                      | 2                |
| 11                                                                | CC051/TAUUNC       | Yes                     | 3                |
| 12                                                                | CC041/TAUUNC       | Yes                     | 3                |
| 14                                                                | CC011/UNC          | Yes                     | 3                |
| 15                                                                | CC057/UNC          | No                      | 3                |
| 16                                                                | CC036/UNC          | Yes                     | 3                |
| 17                                                                | CC035/UNC          | No                      | 3                |
| 18                                                                | CC023/GENIUNC      | Yes                     | 3                |
| 19                                                                | CC053/UNC          | No                      | 3                |
| 20                                                                | CC031/GENIUNC      | Yes                     | 3                |
| 21                                                                | CC008/GENIUNC      | No                      | 3                |
| 22                                                                | CC032/GENIUNC      | Yes                     | 3                |
| 23                                                                | CC030/GENIUNC      | No                      | 3                |
| 24                                                                | CC025/GENIUNC      | No                      | 1                |
| 25                                                                | CC012/GENIUNC      | No                      | 3                |
| 26                                                                | CC027/GENIUNC      | Yes                     | 3                |
| 27                                                                | CC079/TAUUNC       | No                      | 3                |
| 28                                                                | CC065/UNC          | No                      | 3                |
| 29                                                                | CC072/TAUUNC       | Yes                     | 3                |
| 30                                                                | CC004/TAUUNC       | Yes                     | 3                |
| 31                                                                | CC005/TAUUNC       | No                      | 3                |
| 33                                                                | CC059/TAUUNC       | Yes                     | 3                |
| 34                                                                | CC013/GENIUNC      | No                      | 3                |
| 35                                                                | CC015/UNC          | No                      | 2                |
| 36                                                                | CC024/GENIUNC      | No                      | 3                |
| 37                                                                | CC017/UNC          | No                      | 3                |
| 38                                                                | CC021/UNC          | No                      | 3                |
| 39                                                                | CC046/UNC          | Yes                     | 3                |
| 40                                                                | CC056/GENIUNC      | No                      | 3                |
| 41                                                                | CC043/GENIUNC      | Yes                     | 3                |
| 42                                                                | CC044/UNC          | Yes                     | 3                |
| 43                                                                | CC050/UNC          | No                      | 2                |
| 44                                                                | CC052/GENIUNC      | Yes                     | 3                |
| 45                                                                | CC058/UNC          | No                      | 3                |
| 46                                                                | CC060/UNC          | No                      | 3                |
| 47                                                                | CC061/GENIUNC      | Yes                     | 3                |
| 48                                                                | CC063/UNC          | No                      | 3                |
| 49                                                                | CC078/TAUUNC       | No                      | 3                |
